# Supplementary material for: High-Throughput UHPLC-MS to Screen Metabolites in Feces for Gut Metabolic Health
Source: MDPI journal article supplement (doi:10.3390/metabo12030211), 2022-02-25
Supplement: s1 [file s1]

## SUPPORTING INFORMATION

# High-Throughput UHPLC-MS to Screen Metabolites in Feces for Gut Metabolic Health

Andressa de Zawadzki <sup>1</sup>, Maja Thiele <sup>2,3</sup>, Tommi Suviola <sup>1</sup>, Asger Wretling <sup>1</sup>, Min Kim <sup>1,4</sup>, Mina Ali <sup>1</sup>, Annette F. Bjerre <sup>1</sup>, Karin Stahr <sup>1</sup>, Ismo Mattila <sup>1</sup>, Torben Hansen <sup>5</sup>, Aleksander Krag <sup>2,3</sup> and Cristina Legido-Quigley <sup>1,6,\*</sup>

- <sup>1</sup> Steno Diabetes Center Copenhagen, 2730 Herlev, Denmark; andressa.de.zawadzki@regionh.dk (A.d.Z.); tommi.raimo.leo.suviola@regionh.dk (T.S.); asger.wretling@regionh.dk (A.W.); min.kim@dbac.dk (M.K.); mina.ali@regionh.dk (M.A.); annette.frost.bjerre@regionh.dk (A.F.B.); karin.stahr.01@regionh.dk (K.S.); ismo.matias.mattila@regionh.dk (I.M.)
  - <sup>2</sup> Department of Gastroenterology and Hepatology, Odense University Hospital, 5000 Odense, Denmark; maja.thiele@rsyd.dk (M.T.); aleksander.krag@rsyd.dk (A.K.)
  - <sup>3</sup> Department of Clinical Medicine, University of Southern Denmark, 5230 Odense, Denmark
  - <sup>4</sup> Copenhagen Prospective Studies on Asthma in Childhood, Herlev and Gentofte Hospital, 2730 Herlev, Denmark
  - <sup>5</sup> Novo Nordisk Foundation Center for Basic Metabolic Research, Faculty of Health and Medical Sciences, University of Copenhagen, 1165 Copenhagen, Denmark; torben.hansen@sund.ku.dk
  - <sup>6</sup> Institute of Pharmaceutical Science, King's College London, London SE19NH, UK
- \* Correspondence: cristina.legido.quigley@regionh.dk

**Abstract:** Feces are the product of our diets and have been linked to diseases of the gut, including Chron's disease and metabolic diseases such as diabetes. For screening metabolites in heterogeneous samples such as feces, it is necessary to use fast and reproducible analytical methods that maximize metabolite detection. As sample preparation is crucial to obtain high quality data in MS-based clinical metabolomics, we developed a novel, efficient and robust method for preparing fecal samples for analysis with a focus in reducing aliquoting and detecting both polar and non-polar metabolites. Fecal samples (n = 475) from patients with alcohol-related liver disease and healthy controls were prepared according to the proposed method and analyzed in an UHPLC-QQQ targeted platform in order to obtain a quantitative profile of compounds that impact liver-gut axis metabolism. MS analyses of the prepared fecal samples have shown reproducibility and coverage of n = 28 metabolites, mostly comprising bile acids and amino acids. We report metabolite-wise relative standard deviation (RSD) in quality control samples, inter-day repeatability, LOD, LOQ, range of linearity and method recovery. The average concentrations for 135 healthy participants are reported here for clinical applications. Our high-throughput method provides a novel tool for investigating gut-liver axis metabolism in liver-related diseases using a noninvasive collected sample.

**Keywords:** bile acids; fecal metabolomics; gut-liver axis; targeted metabolomics; sample preparation

# Supporting information

## Table of contents

|                                                                                                                                                                                                                                                                                                                                                                                                                                                                                                                                                                        |    |
|------------------------------------------------------------------------------------------------------------------------------------------------------------------------------------------------------------------------------------------------------------------------------------------------------------------------------------------------------------------------------------------------------------------------------------------------------------------------------------------------------------------------------------------------------------------------|----|
| <b>Table S1.</b> MS parameters of the dynamic MRM method that was optimized from Ahonen et al., 2019 for detection of metabolites in fecal samples. Parameters include MRM transition, polarity, retention time, fragmentor voltage (V), collision energy (V).                                                                                                                                                                                                                                                                                                         | 3  |
| <b>Table S2.</b> MS parameters of the dynamic MRM method that was optimized from Ahonen et al., 2019 for detection of the internal standards in fecal samples. Parameters include MRM transition, polarity, retention time, fragmentor voltage (V), collision energy (V). Final concentration of internal standards (IS) in the ISTDmix in ng mL <sup>-1</sup> and was determined for each compound based on their limits of quantification.                                                                                                                           | 5  |
| <b>Table S3.</b> Metabolites identified by GCGC-MS in fecal samples from healthy controls. Columns represent the classes of compounds that belong to fatty acid metabolism, amino acid metabolism, carbohydrate metabolites, TCA and others.                                                                                                                                                                                                                                                                                                                           | 6  |
| <b>Table S4.</b> Limit of detection (LOD); limit of quantification (LOQ); linearity (R <sup>2</sup> ); linear regression parameters for calibration curves: (A) slope and (B) intercept with standard deviation (SD); range of linearity by UHPLC-MS analysis of bile acids and amino acids.                                                                                                                                                                                                                                                                           | 7  |
| <b>Table S5.</b> Metabolite-wise relative standard deviation (RSD) in pooled samples (PO), study samples ("sample"), estimated ratio between biological variation and technical variation ("ratio"), inter-day repeatability for two different concentrations (conc. 1 and conc. 2) in the range of LLOQ and ULOQ and, relative recovery calculated for samples spiked with standards at low (LS), medium (MS) and high concentrations (HS).                                                                                                                           | 8  |
| <b>Figure S1.</b> Study design for evaluation of method reproducibility in a UHPLC-MS targeted platform. Quality control (QC) samples including blanks, calibration solutions and pooled samples were distributed throughout 600 injections. Four calibration curves were placed at the beginning, middle and at the end of the analysis. Analysis started with 2 blanks, 3 pooled samples, a calibration curve with 11 levels of concentration and 1 blank. A unit composed by a blank, a pool and 16 clinical samples was repeated until the next calibration curve. | 9  |
| <b>Figure S2.</b> Analytical stability of a targeted UHPLC-MS platform for quantitative analysis of metabolites related to gut-liver axis. Time related variation of metabolite response measured in quality control pooled samples representing replicates and samples representing a cohort. Interval of variation in QC pooled samples is represented in grey.                                                                                                                                                                                                      | 10 |
| <b>Figure S3.</b> Violin plots for distribution of metabolite concentrations across human fecal samples representing a cohort with different degrees of liver disease (n=475) and fecal pooled samples (PO), used as replicates (n=36) for quality control.                                                                                                                                                                                                                                                                                                            | 11 |

**Table S1.** MS parameters of the dynamic MRM method that was optimized from Ahonen et al., 2019 for detection of metabolites in fecal samples. Parameters include MRM transition, polarity, retention time, fragmentor voltage (V), collision energy (V).

| Compound                    | Abbreviation  | Molecular Weight (MW) | Retention time | MRM transition | Polarity | Fragmentor Voltage (V) | Collision Energy (V) | Cell Accelerator Voltage (V) |
|-----------------------------|---------------|-----------------------|----------------|----------------|----------|------------------------|----------------------|------------------------------|
| DL-2-Aminoadipic Acid       | AADA          | 161.2                 | 2.6            | 330.2–160.1    | Negative | 150                    | 10                   | 1                            |
| Asymmetric dimethylarginine | ADMA and SDMA | 202.3                 | 2.4            | 371.2–201.2 *  | Negative | 150                    | 5                    | 5                            |
|                             |               |                       | 2.4            | 371.2–156.1    | Negative | 150                    | 20                   | 1                            |
| L-Alanine                   | Ala           | 89.1                  | 2.6            | 258.1–88.1     | Negative | 100                    | 15                   | 3                            |
| Azelaic acid                | AzelA         | 188.2                 | 3.8            | 187.2–169      | Negative | 150                    | 10                   | 2                            |
|                             |               |                       | 3.8            | 187.2–125.2 *  | Negative | 150                    | 15                   | 2                            |
| L-3-hydroxybutyric Acid     | β-OHB         | 104.1                 | 0.7            | 103.2–59.2     | Negative | 100                    | 5                    | 1                            |
| Cholic Acid                 | CA            | 408.6                 | 6.4            | 407.3–407.3 *  | Negative | 250                    | 10                   | 3                            |
|                             |               |                       | 6.4            | 407.3–343.3    | Negative | 250                    | 35                   | 1                            |
| Deoxychenocholic Acid       | CDCA          | 392.6                 | 7.0            | 391.3–391.3    | Negative | 200                    | 10                   | 4                            |
| L-Citrulline                | Cit           | 175.2                 | 2.5            | 344.4–174.2    | Negative | 150                    | 4                    | 7                            |
| Deoxycholic Acid            | DCA           | 392.6                 | 7.0            | 391.2–345.3 *  | Negative | 200                    | 35                   | 4                            |
|                             |               |                       | 7.0            | 391.2–327.2    | Negative | 200                    | 40                   | 4                            |
| Gamma-butyrobetaine         | GBB           | 146.2                 | 0.85           | 147.2–88.1 *   | Positive | 100                    | 16                   | 1                            |
|                             |               |                       | 0.85           | 147.2–60.2     | Positive | 100                    | 13                   | 1                            |
| Glycocholic Acid            | GCA           | 465.6                 | 5.95           | 464.3–402.1    | Negative | 250                    | 40                   | 4                            |
|                             |               |                       | 5.95           | 464.3–74.1 *   | Negative | 250                    | 45                   | 7                            |
| Glycochenodeoxycholic Acid  | GCDCA         | 449.6                 | 6.5            | 448.3–448.3    | Negative | 200                    | 40                   | 2                            |
|                             |               |                       | 6.5            | 448.3–74.1     | Negative | 200                    | 55                   | 4                            |
| Glycodeoxycholic Acid       | GDCA          | 449.6                 | 6.6            | 448.3–74.2     | Negative | 200                    | 55                   | 4                            |
| Glycolithocholic acid       | GLCA          | 433.3                 | 7.1            | 432.3–388.1    | Negative | 200                    | 25                   | 4                            |
|                             |               |                       |                | 432.3–74.1*    | Negative | 200                    | 45                   | 4                            |
| L-Glutamine                 | Gln           | 146.1                 | 2.4            | 315.3–145.1    | Negative | 100                    | 9                    | 6                            |
| L-Glutamic Acid             | Glu           | 147.1                 | 2.45           | 316.1–146.1    | Negative | 100                    | 6                    | 6                            |
| Glycine                     | Gly           | 75.1                  | 2.4            | 244.1–74.1     | Negative | 200                    | 7                    | 4                            |
| Glycoursodeoxycholic Acid   | GUDCA         | 449.6                 | 6.0            | 448.3–386      | Negative | 250                    | 40                   | 2                            |
|                             |               |                       | 6.0            | 448.3–74.1 *   | Negative | 250                    | 45                   | 2                            |
| L-Homocitrulline            | HCit          | 189.2                 | 2.6            | 358.3–188.1    | Negative | 200                    | 10                   | 1                            |
|                             |               |                       | 2.6            | 358.3–145 *    | Negative | 150                    | 25                   | 2                            |
| Indoxyl Sulfate             | IndS          | 213.2                 | 2.55           | 212–132 *      | Negative | 100                    | 15                   | 2                            |
|                             |               |                       | 2.55           | 212–80         | Negative | 100                    | 20                   | 2                            |
| L-Kynurenine                | Kynu          | 208.2                 | 3.65           | 377–316.1      | Negative | 150                    | 5                    | 2                            |

| Compound                   | Abbreviation   | Molecular Weight (MW) | Retention time | MRM transition | Polarity | Fragmentor Voltage (V) | Collision Energy (V) | Cell Accelerator Voltage (V) |
|----------------------------|----------------|-----------------------|----------------|----------------|----------|------------------------|----------------------|------------------------------|
|                            |                |                       | 3.65           | 377–207 *      | Negative | 150                    | 5                    | 5                            |
| Lithocholic acid           | LCA            | 376.3                 | 7.6            | 375.3–375.3    | Negative | 240                    | 10                   | 4                            |
|                            |                |                       | 7.6            | 375.3–45       | Negative | 240                    | 100                  | 4                            |
| L-Leucine                  | Leu and Ile    | 131.2                 | 3.72           | 300.2–130.2    | Negative | 100                    | 10                   | 1                            |
| L-Isoleucine               | Ile            | 131.2                 | 3.6            | 300.2–130.2    | Negative | 100                    | 10                   | 1                            |
| N-methyl-nicotinamide      | N-MNA          | 136.2                 | 1.05           | 137.1–108.1    | Positive | 100                    | 15                   | 2                            |
|                            |                |                       |                | 137.1–80.2 *   | Positive | 100                    | 26                   | 2                            |
| L-Phenylalanine            | Phe            | 165.2                 | 3.95           | 334.2–164      | Negative | 100                    | 10                   | 1                            |
| Taurine                    | Taurine        | 125.2                 | 2.32           | 294.1–124.1 *  | Negative | 100                    | 10                   | 2                            |
|                            |                |                       |                | 294.1–80.1     | Negative | 100                    | 55                   | 2                            |
| Taurocholic Acid           | TCA            | 515.7                 | 5.7            | 514.3–123.8    | Negative | 300                    | 65                   | 5                            |
|                            |                |                       | 5.7            | 514.3–80.2 *   | Negative | 300                    | 95                   | 1                            |
| Taurochenodeoxycholic Acid | TDCA and TCDCA | 499.3                 | 6.05           | 498.3–107.1    | Negative | 250                    | 80                   | 4                            |
|                            |                |                       |                | 498.3–80.1 *   | Negative | 300                    | 90                   | 4                            |
| Taurodeoxycholic Acid      |                | 499.3                 | 6.15           | 498.3–498.3    | Negative | 250                    | 10                   | 4                            |
| L-Tryptophan               | Trp            | 204.2                 | 4.27           | 373.2–203.1    | Negative | 150                    | 7                    | 2                            |
| Tauroursodeoxycholic Acid  | TUDCA          | 499.7                 | 5.7            | 498.3–107.1    | Negative | 250                    | 65                   | 5                            |
|                            |                |                       |                | 498.3–80.1 *   | Negative | 250                    | 70                   | 1                            |
| L-Tyrosine                 | Tyr            | 181.2                 | 3.97           | 350.2–180.1    | Negative | 100                    | 7                    | 5                            |
| Ursodeoxycholic acid       | UDCA           | 392.3                 |                | 391.3–391.3    | Negative | 250                    | 10                   | 4                            |
|                            |                |                       | 7.0            | 391.3–289.3    | Negative | 250                    | 45                   | 4                            |

\*ion transition used for quantification;

MRM transitions of amino acids represent the ion transition for the adduct with AQC reagent.

**Table S2.** MS parameters of the dynamic MRM method that was optimized from Ahonen et al., 2019 for detection of the internal standards in fecal samples. Parameters include MRM transition, polarity, retention time, fragmentor voltage (V), collision energy (V). Final concentration of internal standards (IS) in the ISTDmix in ng mL<sup>-1</sup> and was determined for each compound based on their limits of quantification.

| Compound                                | IS concentration (ng mL <sup>-1</sup> ) | Molecular Weight (MW) | Retention time (min) | MRM transition | Polarity | Fragmentor Voltage (V) | Collision Energy (V) | Cell Accelerator Voltage (V) |
|-----------------------------------------|-----------------------------------------|-----------------------|----------------------|----------------|----------|------------------------|----------------------|------------------------------|
| AADA-d3                                 | 30000                                   | 164.2                 | 2.6                  | 333.2–145.2    | Negative | 100                    | 20                   | 2                            |
| ADMA-d7                                 | 10000                                   | 209.8                 | 2.45                 | 378–208.3      | Negative | 100                    | 10                   | 5                            |
| Ala-d4                                  | 5000                                    | 93.1                  | 2.6                  | 262.1–92.1     | Negative | 100                    | 5                    | 6                            |
| AzeA-d14                                | 5000                                    | 202.3                 | 3.7                  | 201.2–137.2    | Negative | 150                    | 10                   | 2                            |
| β-OHB-d4                                | 100000                                  | 108.1                 | 0.75                 | 107.1–59.1     | Negative | 100                    | 5                    | 1                            |
| CA-d4                                   | 500                                     | 412.3                 | 6.37                 | 411.3–411.3    | Negative | 250                    | 10                   | 3                            |
| CDCA-d4 DCA-d4                          | 500                                     | 396.6                 | 7.0                  | 395.2–395.2    | Negative | 300                    | 10                   | 4                            |
| Cit-d4                                  | 1000                                    | 179.2                 | 2.47                 | 348.1–135.1    | Negative | 100                    | 25                   | 2                            |
| GBB-d9                                  | 5000                                    | 154.7                 | 0.87                 | 155.2–87.3     | Positive | 100                    | 13                   | 1                            |
| GCA-d4                                  | 250                                     | 469.6                 | 5.97                 | 468.3–74.1     | Negative | 250                    | 45                   | 1                            |
| GCDCA-d4 GUDCA-d4                       | 30000                                   | 453.6                 | 6.55                 | 452.3–74.1     | Negative | 250                    | 40                   | 1                            |
| GUDCA-d4                                | 10000                                   | 453.6                 | 6.55                 | 452.3–74.1     | Negative | 250                    | 40                   | 1                            |
| GDCA-d6                                 | 30000                                   | 455.7                 | 6.6                  | 454.3–408.2    | Negative | 250                    | 55                   | 4                            |
| GLCA-d4                                 | 1000                                    | 437.3                 | 7.1                  | 436.3–74.1     | Negative | 200                    | 50                   | 4                            |
| Gln-d5                                  | 60000                                   | 151.2                 | 2.46                 | 320.1–150.1    | Negative | 100                    | 5                    | 1                            |
| Glu-d5                                  | 10000                                   | 152.1                 | 2.46                 | 321.1–151.1    | Negative | 100                    | 5                    | 1                            |
| Gly-13C <sub>2</sub> d <sub>2</sub>     | 10000                                   | 78.1                  | 2.4                  | 247–77.1       | Negative | 100                    | 5                    | 7                            |
| HCit-2H <sub>4</sub>                    | 10000                                   | 193.2                 | 2.6                  | 362.2–192.2    | Negative | 100                    | 5                    | 6                            |
| IndS-d4                                 | 10000                                   | 217.3                 | 2.55                 | 216–136.1      | Negative | 100                    | 15                   | 2                            |
| Kynu-13C <sub>6</sub>                   | 30000                                   | 214.2                 | 3.6                  | 383.1–195.8    | Negative | 100                    | 10                   | 6                            |
| LCA-d4                                  | 1000                                    | 380.3                 | 7.55                 | 379.3–379.3    | Negative | 240                    | 100                  | 4                            |
| Leu-d <sub>10</sub> Ile-d <sub>10</sub> | 5000                                    | 141.2                 | 3.6<br>3.55          | 310.1–140      | Negative | 125                    | 10                   | 2                            |
| N-MNA-d4                                | 750                                     | 140.2                 | 1.3                  | 141.2–84.2     | Positive | 100                    | 20                   | 7                            |
| Phe-d5                                  | 1000                                    | 170.2                 | 3.9                  | 339.1–169.1    | Negative | 150                    | 5                    | 1                            |
| Taurine-d4                              | 1000                                    | 129.2                 | 2.32                 | 298.3–128.2    | Negative | 100                    | 10                   | 3                            |
| TCA-d4                                  | 500                                     | 519.7                 | 5.7                  | 518.3–80       | Negative | 340                    | 100                  | 7                            |
| TCDCA-d9                                | 500                                     | 508.3                 | 6.1                  | 507.4–80.1     | Negative | 300                    | 95                   | 4                            |
| Trp-d8                                  | 5000                                    | 212.3                 | 4.25                 | 381.2–211.2    | Negative | 100                    | 10                   | 5                            |
| TUDCA-d4                                | 250                                     | 503.7                 | 5.7                  | 502.3–80.1     | Negative | 250                    | 70                   | 1                            |
| Tyr-d7                                  | 5000                                    | 188.2                 | 2.97                 | 357.1–187.2    | Negative | 100                    | 10                   | 1                            |
| UDCA-d4                                 | 250                                     | 396.6                 | 7.0                  | 395.3–395.3    | Negative | 250                    | 0                    | 4                            |

MRM transitions of amino acids represent the ion transition for the adduct with AQC reagent.

**Table S3.** Metabolites identified by GCGC-MS in fecal samples from healthy controls. Columns represent the classes of compounds that belong to fatty acid metabolism, amino acid metabolism, carbohydrate metabolites, TCA and others.

| Free fatty acids   |                            | Amino acids   | Carbohydrates           | TCA metabolites /others      |
|--------------------|----------------------------|---------------|-------------------------|------------------------------|
| Stearic acid       | Nonanedioic acid           | Methionine    | Myo inositol            | Citric acid                  |
| Oleic acid         | Tetradecanoic acid         | Serine        | d-Ribose                | Fumaric acid                 |
| Palmitic acid      | 1,4-Butanediol             | Glycine       | L-(-)-Fucose            | Succinic acid                |
| Palmitoleic acid   | 1-Octadecanol              | Leucine       | Sorbitol                | Malic acid                   |
| 1-Monopalmitin     | 1-Dodecanol                | Phenylalanine | Maltose                 | Lactic acid                  |
| Linoleic acid      | 3,4-Dihydroxybutanoic acid | Alanine       | d-Galactose             | 3-Indoleacetic acid          |
| Tetradecanoic acid | 2,4-Dihydroxybutanoic acid | Proline       | D-Arabinose             | 3-Hydroxyphenylacetic acid   |
| Butanoic acid      | 4-Hydroxybutanoic acid     | Valine        | Lactic acid             | Deoxycholic acid (bile acid) |
| Hexanoic acid      | Benzoic acid               | a-alanine     | D-(-)-Fructofuranose    |                              |
| Pentanoic acid     | Triethylene glycol         | cadaverine    | a -D-Glucopyranose      |                              |
| Heptanoic acid     | Diethylene glycol          |               | D-(+)-Galactopyranose   |                              |
| Octanoic acid      | Glyceric acid              |               | alpha-ketoglutaric acid |                              |
| Nonanoic acid      | Glycerol                   |               |                         |                              |
| Decanoic acid      | Glycerol monostearate      |               |                         |                              |
| Heptadecanoic acid | 5-Aminovaleric acid        |               |                         |                              |
| Pentadecanoic acid | 3-Methyladipic acid        |               |                         |                              |

**Table S4.** Limit of detection (LOD); limit of quantification (LOQ); linearity (R<sup>2</sup>); linear regression parameters for calibration curves: (A) slope and (B) intercept with standard deviation (SD); range of linearity by UHPLC-MS analysis of bile acids and amino acids.

| Compound | LOD<br>(ng mL <sup>-1</sup> ) | LOQ<br>(ng mL <sup>-1</sup> ) | R <sup>2</sup> | slope                 | SD of slope           | intercept            | SD of<br>intercept | LLOQ | ULOQ   |
|----------|-------------------------------|-------------------------------|----------------|-----------------------|-----------------------|----------------------|--------------------|------|--------|
| AADA     | 253.87                        | 769.30                        | 0.951          | 0.00221               | 3.93 10 <sup>-6</sup> | 15.26658             | 0.170031           | 1000 | 50000  |
| ADMA     | 311.35                        | 943.49                        | 0.983          | 0.000184              | 5.11 10 <sup>-7</sup> | -0.11094             | 0.017319           | 1000 | 50000  |
| Ala      | 0.03                          | 0.084                         | 0.978          | 26.20151              | 0.082371              | -3.63255             | 0.221374           | 2    | 50000  |
| AZelA    | 139.47                        | 422.64                        | 0.91           | 0.000597              | 2.12 10 <sup>-6</sup> | -0.50651             | 0.025227           | 500  | 25000  |
| β-OHB    | 177.23                        | 537.06                        | 0.993          | 8.04 10 <sup>-6</sup> | 1.34 10 <sup>-8</sup> | 6.2210 <sup>-5</sup> | 0.000432           | 750  | 10000  |
| CA       | 70.78                         | 214.49                        | 0.999          | 0.00257               | 2.05 10 <sup>-6</sup> | -1.00791             | 0.055114           | 10   | 100000 |
| CDCA     | 0.69                          | 2.09                          | 0.998          | 0.004932              | 2.12 10 <sup>-6</sup> | 0.022947             | 0.001031           | 10   | 50000  |
| Cit      | 217.05                        | 657.71                        | 0.992          | 3.66 10 <sup>-5</sup> | 7.11 10 <sup>-8</sup> | -0.05226             | 0.002409           | 750  | 50000  |
| DCA      | 7.915                         | 23.98                         | 0.995          | 0.000124              | 7.69 10 <sup>-7</sup> | 0.000553             | 0.000296           | 25   | 100000 |
| GBB      | 153.43                        | 464.92                        | 0.992          | 0.000186              | 3.22 10 <sup>-7</sup> | 0.024853             | 0.008633           | 500  | 50000  |
| GCA      | 12.36                         | 37.44                         | 0.999          | 0.001841              | 2.20 10 <sup>-7</sup> | -0.19432             | 0.006893           | 50   | 100000 |
| GCDCA    | 3.81                          | 11.54                         | 0.969          | 0.015198              | 3.29 10 <sup>-5</sup> | 0.056013             | 0.017533           | 50   | 50000  |
| GDCA     | 12.71                         | 38.51                         | 0.989          | 0.009236              | 8.67 10 <sup>-5</sup> | -0.03423             | 0.035568           | 50   | 50000  |
| GLCA     | 6.36                          | 19.29                         | 0.997          | 0.005836              | 2.74 10 <sup>-5</sup> | -0.00354             | 0.011255           | 50   | 100000 |
| Gln      | 230.60                        | 698.78                        | 0.995          | 0.001883              | 8.47 10 <sup>-6</sup> | 1.57648              | 0.131603           | 750  | 25000  |
| Glu      | 174.43                        | 528.58                        | 0.969          | 0.000264              | 4.18 10 <sup>-7</sup> | 0.162696             | 0.01398            | 500  | 50000  |
| Gly      | 265.13                        | 803.42                        | 0.979          | 0.001627              | 4.96 10 <sup>-6</sup> | -2.15256             | 0.130738           | 1000 | 100000 |
| GUDCA    | 5.90                          | 17.88                         | 0.999          | 0.000256              | 1.28 10 <sup>-8</sup> | -0.05641             | 0.000458           | 50   | 100000 |
| HCit     | 295.98                        | 896.90                        | 0.985          | 0.000598              | 1.58 10 <sup>-6</sup> | -0.88806             | 0.053648           | 1000 | 50000  |
| Ile      | 32.20                         | 97.57                         | 0.944          | 0.0016                | 3.27 10 <sup>-5</sup> | -0.01189             | 0.015609           | 100  | 50000  |
| IndS     | 145.05                        | 439.54                        | 0.996          | 3.09 10 <sup>-5</sup> | 4.30 10 <sup>-8</sup> | -0.02029             | 0.001358           | 500  | 100000 |
| Kynu     | 171.43                        | 519.47                        | 0.972          | 0.481562              | 7.42 10 <sup>-4</sup> | -1045.78             | 25.0159            | 500  | 10000  |
| LCA      | 7.09                          | 21.49                         | 0.998          | 0.00247               | 1.11 10 <sup>-5</sup> | 0.016653             | 0.005307           | 10   | 100000 |
| Leu      | 0.02                          | 0.05                          | 0.972          | 45.95384              | 0.16                  | -3.75385             | 0.250482           | 2    | 100000 |
| N-MNA    | 11.29                         | 34.23                         | 0.994          | 0.000535              | 4.23 10 <sup>-6</sup> | -0.00196             | 0.001832           | 100  | 50000  |
| Phe      | 34.75                         | 105.31                        | 0.941          | 0.00034               | 7.50 10 <sup>-6</sup> | -0.0028              | 0.003578           | 250  | 50000  |
| Taurine  | 81.68                         | 247.51                        | 0.995          | 0.000618              | 3.44 10 <sup>-7</sup> | -1.45427             | 0.015284           | 250  | 50000  |
| TCA      | 37.39                         | 113.32                        | 0.999          | 0.004373              | 1.16 10 <sup>-6</sup> | 0.615186             | 0.049558           | 100  | 100000 |
| TCDCA    | 0.07                          | 0.21                          | 0.998          | 0.033012              | 4.10 10 <sup>-6</sup> | -0.02961             | 0.000682           | 50   | 100000 |
| TDCA     | 23.52                         | 71.27                         | 0.966          | 0.026576              | 0.000437              | -0.12875             | 0.189402           | 100  | 100000 |
| Trp      | 225.02                        | 681.88                        | 0.932          | 0.00255               | 9.95 10 <sup>-6</sup> | -6.27553             | 0.173872           | 750  | 100000 |
| Tyr      | 165.60                        | 501.82                        | 0.992          | 0.000319              | 4.92 10 <sup>-7</sup> | -0.34754             | 0.016009           | 500  | 100000 |
| UDCA     | 5.65                          | 17.12                         | 0.997          | 0.004278              | 1.90 10 <sup>-5</sup> | 0.008358             | 0.007324           | 50   | 50000  |
| TUDCA    | 60.80                         | 184.23                        | 0.997          | 0.003023              | 1.30 10 <sup>-6</sup> | -0.31566             | 0.05569            | 500  | 50000  |

**Table S5.** Metabolite-wise relative standard deviation (RSD) in pooled samples (PO), study samples (“sample”), estimated ratio between biological variation and technical variation (“ratio”), inter-day repeatability for two different concentrations (conc. 1 and conc. 2) in the range of LLOQ and ULOQ and, relative recovery calculated for samples spiked with standards at low (LS), medium (MS) and high concentrations (HS).

| Compound         | PO   | Sample               | Ratio | Inter-day<br>repeatability (n=4) |         | Relative Recovery (%) |        |       |
|------------------|------|----------------------|-------|----------------------------------|---------|-----------------------|--------|-------|
|                  |      |                      |       | conc. 1                          | conc. 2 | LS                    | MS     | HS    |
| GBB              | 12.9 | 2.03 10 <sup>3</sup> | 158   | 4.2                              | 2.2     | 82.3                  | 114.8  | 105.0 |
| GCDCA            | 13   | 1.73 10 <sup>3</sup> | 133   | 9.9                              | 15.3    | 95.8                  | 106.1  | 104.8 |
| GDCA             | 29   | 2.05 10 <sup>3</sup> | 70.8  | 15.2                             | 7.7     | 91.6                  | 98.3   | 98.2  |
| Trp              | 7.68 | 491                  | 64    | 5.9                              | 3.8     | 87.2                  | 81.0   | 95.2  |
| Ile              | 12.2 | 411                  | 33.5  | 12.9                             | 8.5     | 82.8                  | 89.8   | 117.8 |
| TUDCA            | 21.3 | 708                  | 33.2  | 16.8                             | 3.55    | 88.7                  | 103.98 | 92.12 |
| AzelA            | 14.4 | 477                  | 33.2  | 7.1                              | 19.8    | 97.6                  | 91.5   | 87.6  |
| CA               | 12.2 | 362                  | 29.7  | 3.8                              | 2.1     | 93.4                  | 94.7   | 101.1 |
| Leu              | 16.9 | 481                  | 28.4  | 2.8                              | 11.5    | 87.3                  | 93.6   | 96.8  |
| GUDCA            | 13.4 | 314                  | 23.5  | 3.7                              | 1.6     | 97.0                  | 103.4  | 111.5 |
| Ala              | 16.1 | 230                  | 14.2  | 17.6                             | 6.5     | 89.2                  | 90.3   | 102.2 |
| TDCA             | 15.7 | 247                  | 15.7  | 9.7                              | 21.4    | 86.9                  | 115.2  | 94.8  |
| Phe              | 11   | 170                  | 15.6  | 3.6                              | 1.9     | 81.3                  | 81.0   | 119.4 |
| TCDCA            | 20.5 | 304                  | 14.8  | 4.2                              | 12.5    | 94.1                  | 102.2  | 82.0  |
| Glu              | 16.2 | 219                  | 13.5  | 26.6                             | 10.6    | 97.4                  | 94.9   | -     |
| GCA              | 22.9 | 300                  | 13.1  | 3.2                              | 1.7     | 113.9                 | 96.6   | 80.1  |
| Cit              | 14.9 | 99.6                 | 6.68  | 2.3                              | 8.5     | 114.3                 | 103.0  | 80.6  |
| TCA              | 13.2 | 65.8                 | 5.0   | 4.1                              | 8.2     | 94.1                  | 102.3  | 82.0  |
| Taurine          | 12.2 | 322                  | 26.3  | 2.5                              | 5.6     | 107.0                 | 86.5   | 102.0 |
| Tyr              | 6.24 | 25.5                 | 4.09  | 4.4                              | 5.1     | 92.1                  | 106.0  | 92.15 |
| LCA              | 15.9 | 105                  | 6.65  | 3.2                              | 5.6     | 113.0                 | 99.0   | 91.0  |
| CDCA             | 29.1 | 100                  | 3.44  | 3.4                              | 2.6     | 102.3                 | 100.8  | 88.2  |
| DCA              | 9.79 | 88                   | 8.89  | 6.4                              | 1.1     | 80.2                  | 86.1   | 86.1  |
| β-OHB            | 21.5 | 273                  | 11.8  | 5.0                              | 13.8    | 81.9                  | 107.2  | 111.3 |
| Gln              | 28.9 | 108                  | 3.0   | 11.5                             | 26.0    | 86.4                  | 105.9  | -     |
| IndS             | 128  | 182                  | 1.42  | 6.5                              | 20.0    | -                     | -      | -     |
| Kynu             | 23.4 | 31                   | 1.33  | 6.2                              | 3.7     | 80.3                  | 99.1   | 118.0 |
| AADA             | 80.8 | 410                  | 5.08  | 8.8                              | 18.3    | -                     | -      | -     |
| UDCA             | 24.0 | 116                  | 4.84  | 12.8                             | 4.3     | -                     | 92.6   | 104.4 |
| GLCA             | 18.5 | 23.9                 | 1.29  | 2.1                              | 10.5    | 103.3                 | 108.0  | 100.8 |
| Gly <sup>a</sup> | -    | -                    | -     | 16.7                             | 16.5    | -                     | -      | -     |
| N-MNA            | 41.7 | 99.2                 | 2.38  | 16.9                             | 4.7     | -                     | -      | -     |
| ADMA             | 34.6 | 43.1                 | 1.24  | 2.5                              | 5.2     | -                     | -      | -     |
| HCit             | 86.4 | 104                  | 1.21  | 6.4                              | 4.9     | 106.2                 | 102.1  | 89.0  |

<sup>a</sup> non-detected in 50% of samples



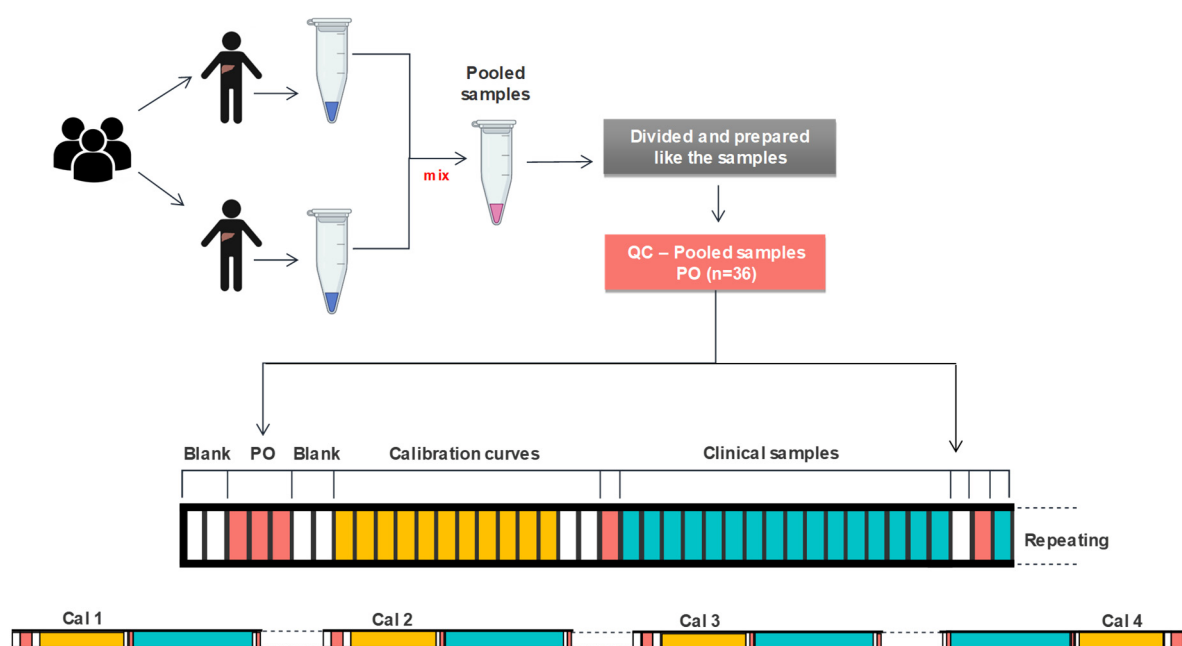

**Figure S1.** Study design for evaluation of method reproducibility in a UHPLC-MS targeted platform. Quality control (QC) samples including blanks, calibration solutions and pooled samples were distributed throughout 600 injections. Four calibration curves were placed at the beginning, middle and at the end of the analysis. Analysis started with 2 blanks, 3 pooled samples, a calibration curve with 11 levels of concentration and 1 blank. A unit composed by a blank, a pool and 16 clinical samples was repeated until the next calibration curve.

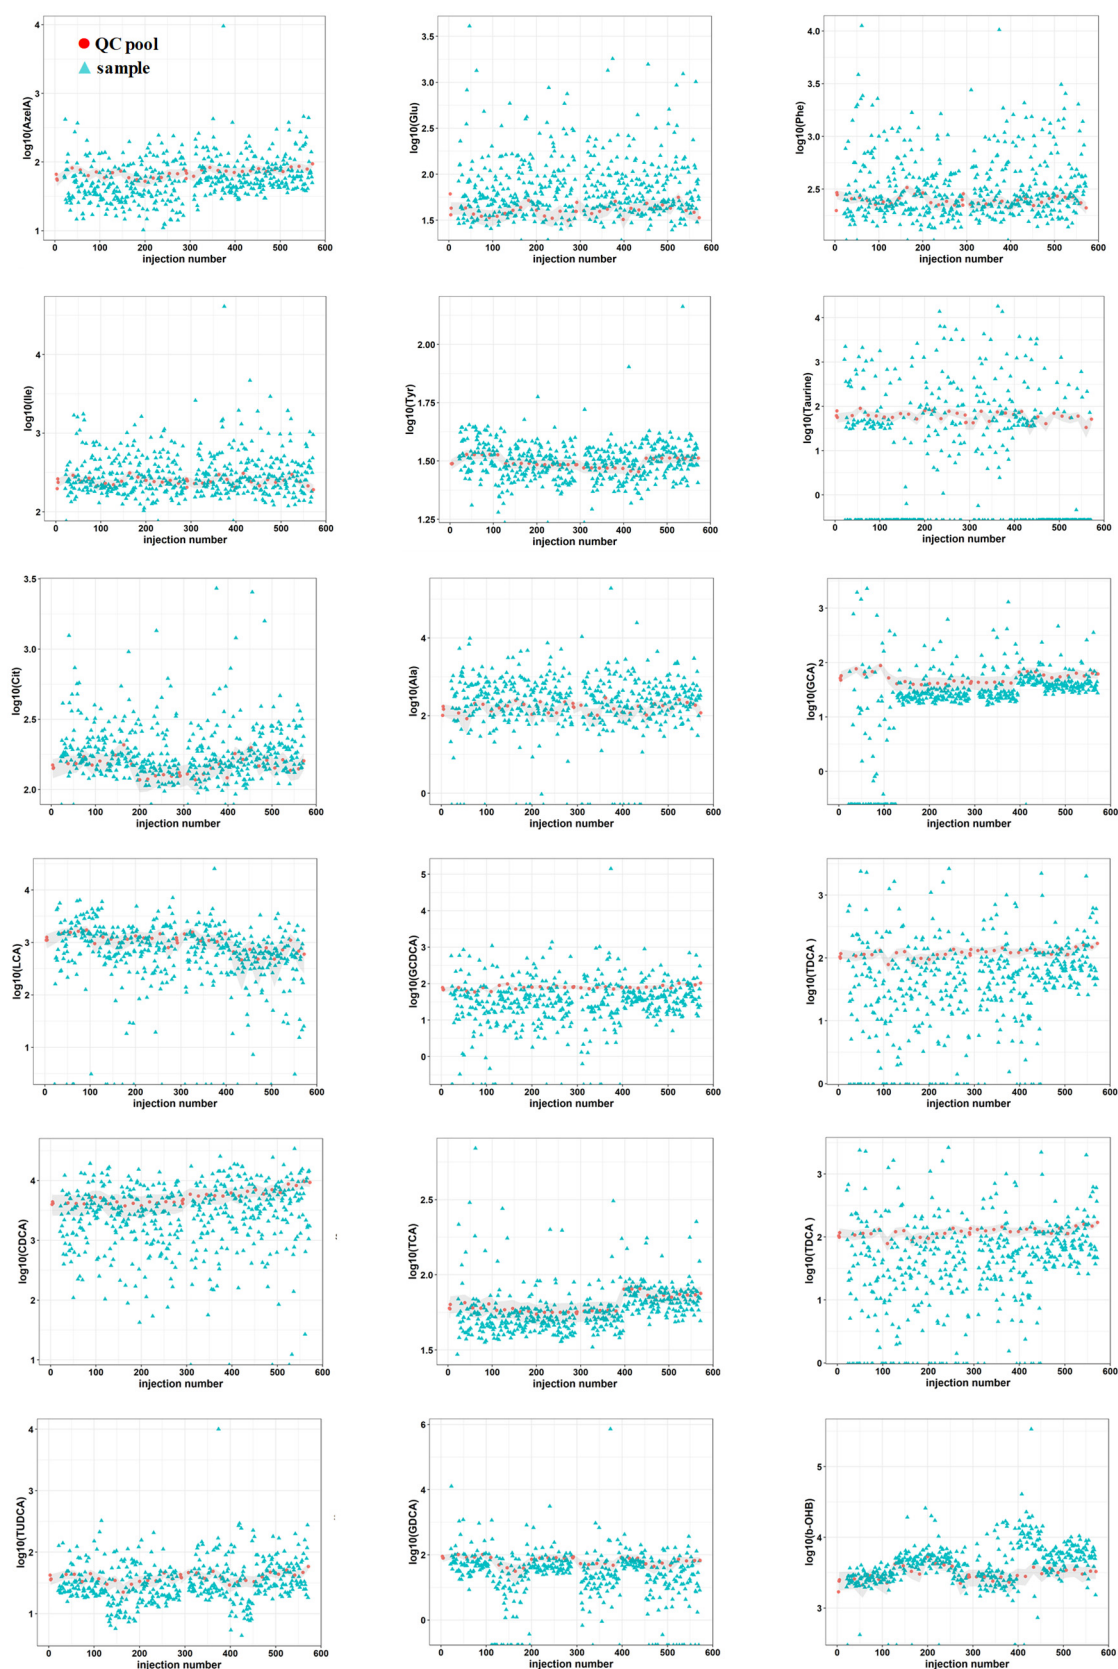

**Figure S2.** Analytical stability of a targeted UHPLC-MS platform for quantitative analysis of metabolites related to gut-liver axis. Time related variation of metabolite response measured in quality control pooled samples representing replicates and samples representing a cohort. Interval of variation in QC pooled samples is represented in grey.

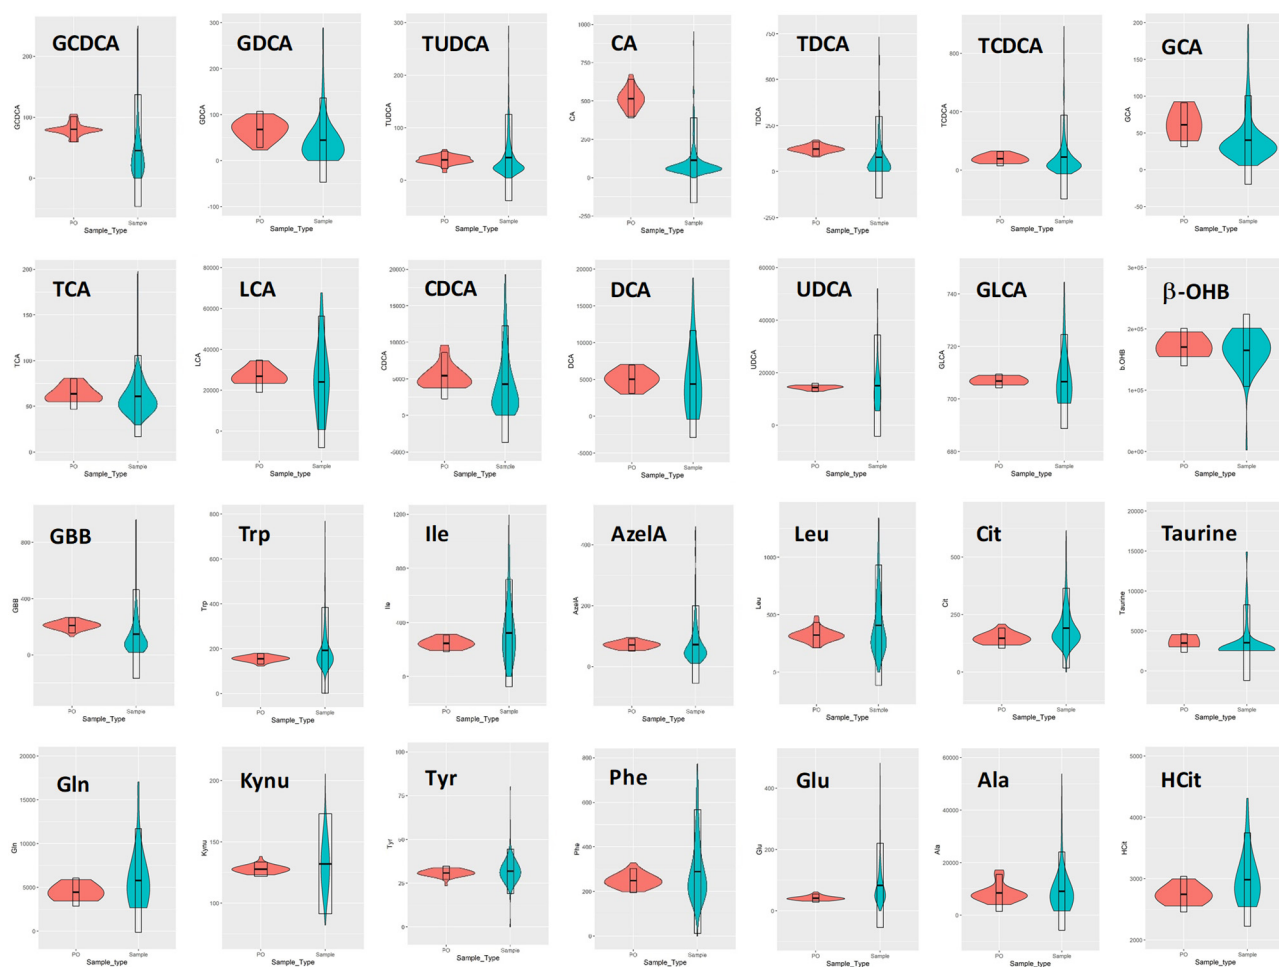

**Figure S3.** Violin plots for distribution of metabolite concentrations across human fecal samples representing a cohort with different degrees of liver disease (n=475) and fecal pooled samples (PO), used as replicates (n=36) for quality control.
